# Supplementary material for: 3D-Printed Coaxial Hydrogel Patches with Mussel-Inspired Elements for Prolonged Release of Gemcitabine
Source: MDPI journal article supplement (doi:10.3390/polym13244367), 2021-12-13
Supplement: s1 [file s1]

# 3D-Printed Coaxial Hydrogel Patches with Mussel-Inspired Elements for Prolonged Release of Gemcitabine

Sepehr Talebian <sup>1,2,\* ,†</sup>, In Kyong Shim <sup>3,†</sup>, Javad Foroughi <sup>4,5</sup>, Gorka Orive <sup>6,7,8</sup>, Kara L. Vine <sup>2,9</sup>, Song Cheol Kim <sup>10,\*</sup> and Gordon G. Wallace <sup>1</sup>

Correspondence should be addressed to Dr. Sepehr Talebian (sepehr.talebian@sydney.edu.au) and Prof. Song Cheol Kim (drksc@amc.seoul.kr).

- <sup>1</sup> Intelligent Polymer Research Institute, ARC Centre of Excellence for Electromaterials Science, AIIM Facility, University of Wollongong, Wollongong, NSW 2522, Australia; gwallace@uow.edu.au
- <sup>2</sup> Illawarra Health and Medical Research Institute, Wollongong, NSW 2522, Australia, kara@uow.edu.au
- <sup>3</sup> Asan Institute for Life Science, University of Ulsan College of Medicine and Asan Medical Center, Seoul 05505, Korea; shimiink@gmail.com
- <sup>4</sup> Faculty of Engineering and Information Sciences, University of Wollongong, Wollongong, NSW 2522 Australia; foroughi@uow.edu.au
- <sup>5</sup> West-German Heart and Vascular Center, University of Duisburg-Essen, Essen 45122, Germany
- <sup>6</sup> NanoBioCel Research Group, School of Pharmacy, University of the Basque Country (UPV/EHU), Vitoria-Gasteiz 01006, Spain; gorka.orive@ehu.es
- <sup>7</sup> Biomedical Research Networking Centre in Bioengineering, Biomaterials and Nanomedicine (CIBER-BBN), Vitoria-Gasteiz 01006, Spain
- <sup>8</sup> Bioaraba, NanoBioCel Research Group, Vitoria-Gasteiz 01006, Spain
- <sup>9</sup> School of Chemistry and Molecular Bioscience, Molecular Horizons, Faculty of Science, Medicine and Health, University of Wollongong, Wollongong, NSW 2522, Australia
- <sup>10</sup> Division of Hepatobiliary and Pancreatic Surgery, Department of Surgery, Asan Medical Center, University of Ulsan College of Medicine, 388-1 Pungnap-2 Dong, Songpa-gu, Seoul, 05505, Korea
- \* Correspondence: sepehr.talebian@sydney.edu.au (S.T.); drksc@amc.seoul.kr (S.C.K.)
- † The first two authors contributed equally

## Supplementary Materials

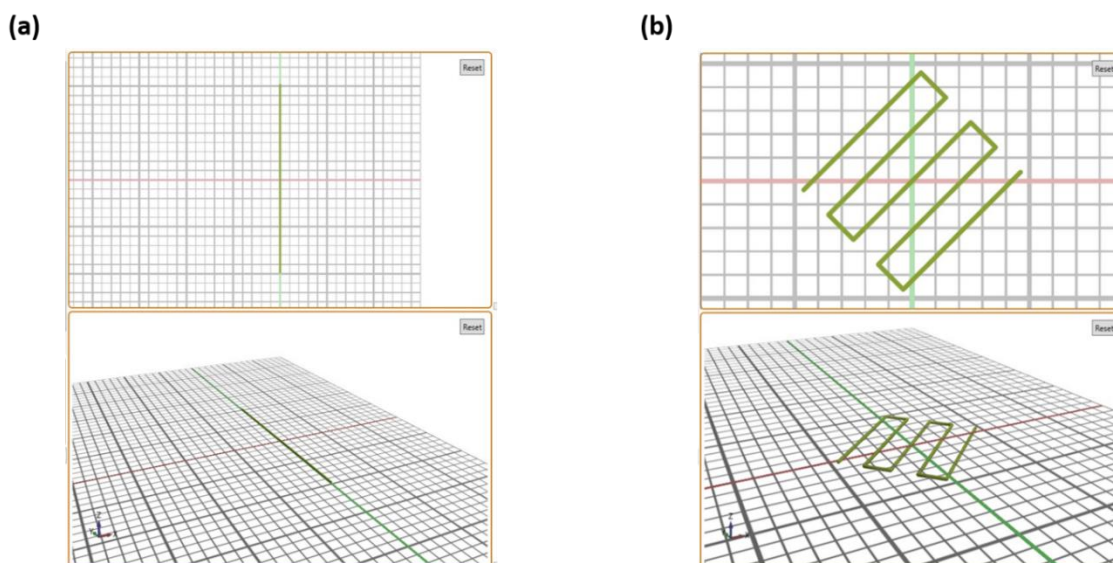

Figure 1. Design of 3D printed coaxial structures including (a) strands, (b) patches.

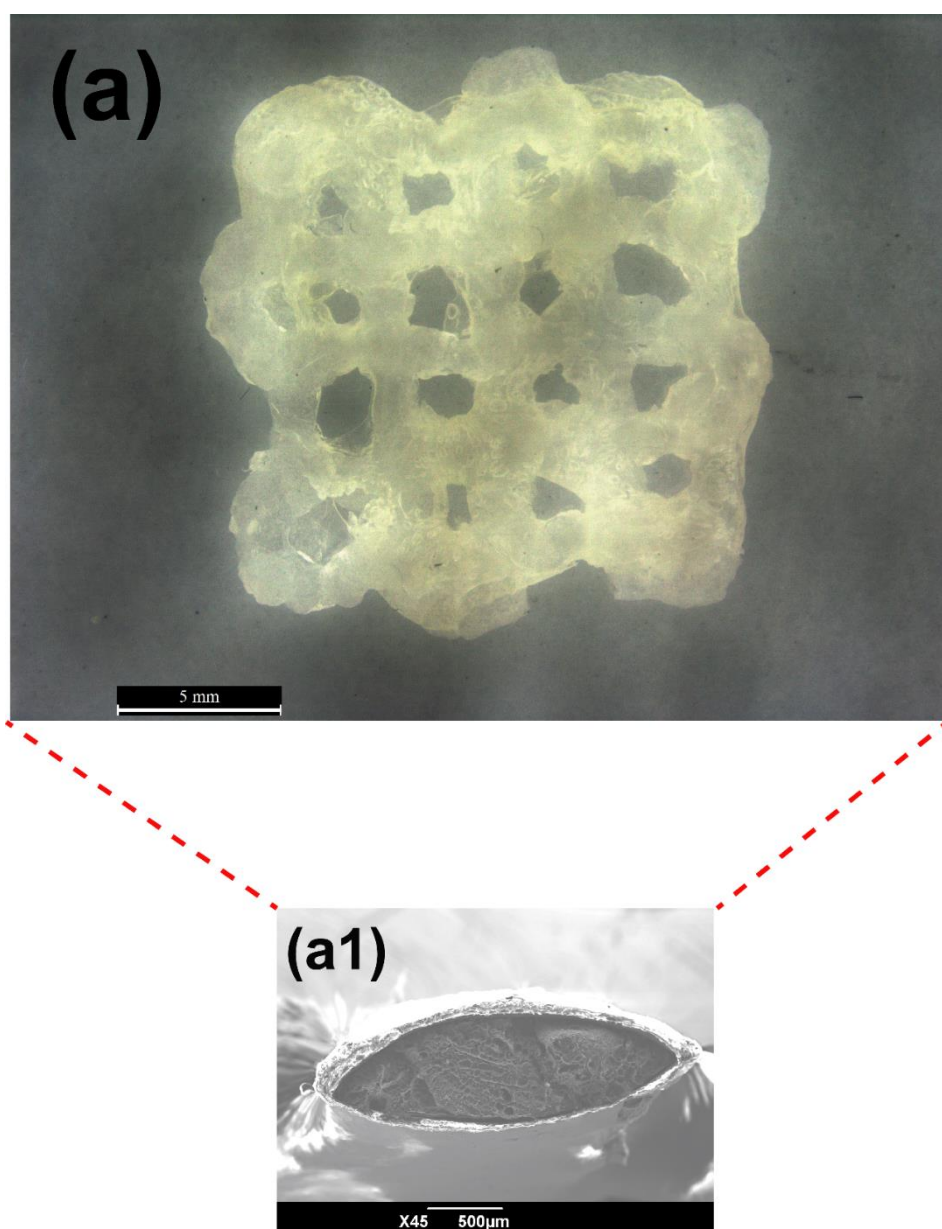

**Figure S2. Light microscopy (a) and (a1) SEM images of PLA coated 3D printed coaxial patches containing  $\text{CaCO}_3$ .**

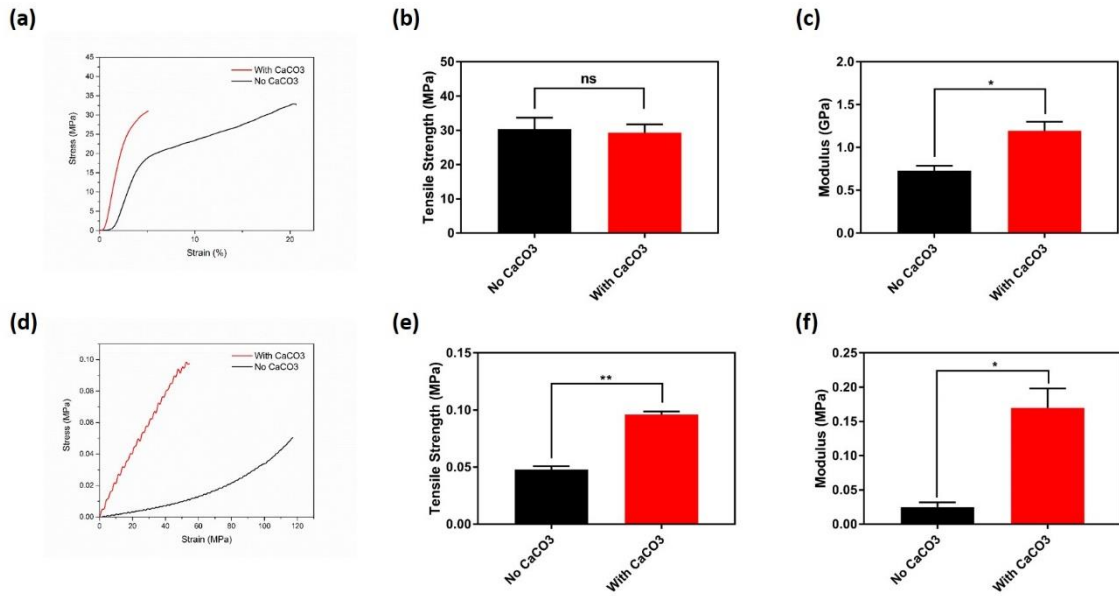

**Figure S3. Mechanical properties of 3D printed coaxial strands following a static tensile test, (a-c) Stress-strain curve, tensile strength, and modulus of strands in dry state (n = 3, mean ± SD). (d-f) Stress-strain curve, tensile strength, and modulus of strands in wet state (n = 3, mean ± SD). (\*P = 0.05, \*\*P ≤ 0.01).**

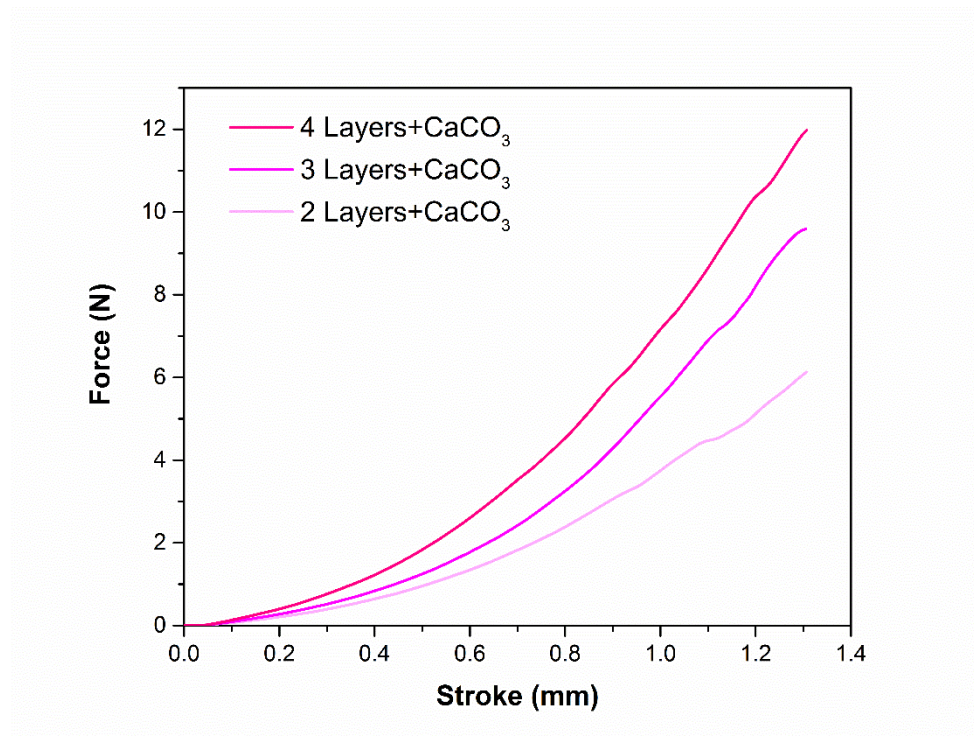

**Figure S4. Static compression testing of 3D printed coaxial patches containing CaCO<sub>3</sub>.**

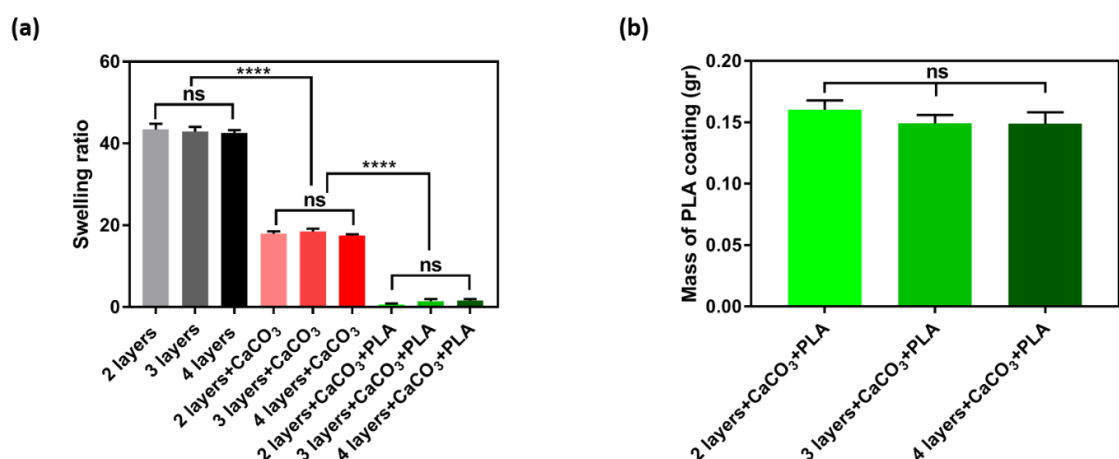

Figure S5. (a) Swelling ratio of different 3D printed coaxial patches in simulated body fluid (SBF). (b) Mass of PLA coating on the 3D printed coaxial patches containing CaCO<sub>3</sub>, showing no significant difference between 2-, 3-, or 4-layers structures.

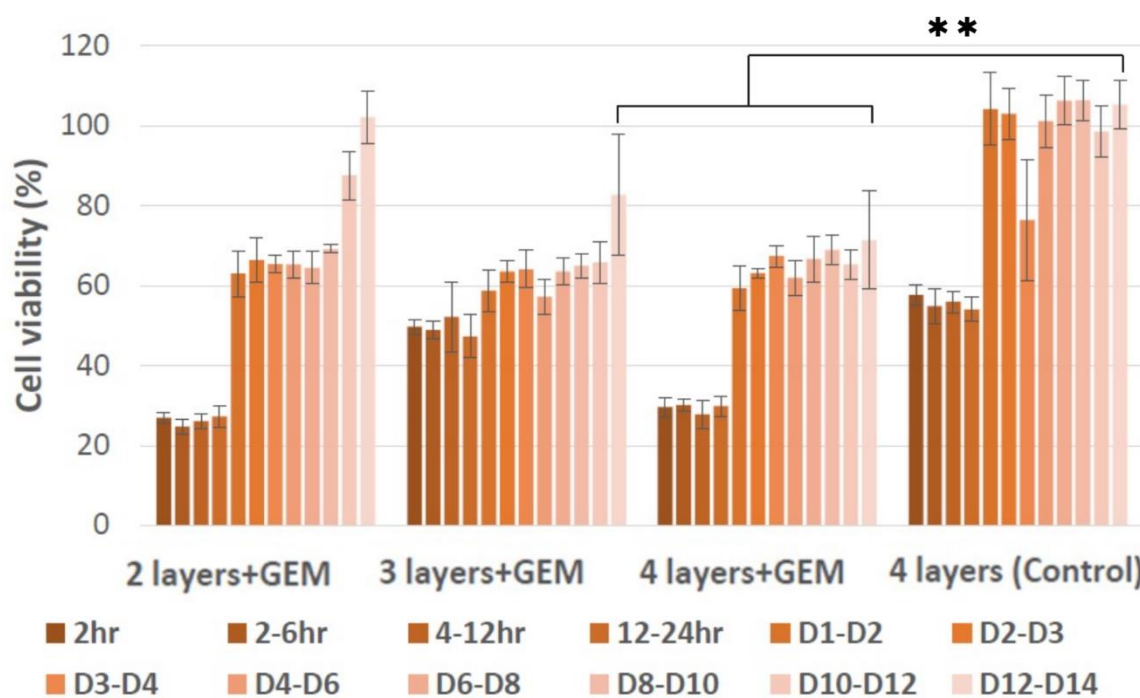

Figure S6. Therapeutic effect of PLA coated 3D printed coaxial patches containing CaCO<sub>3</sub>, with Gemcitabine (+ GEM) or without Gemcitabine (control), on inhibition of MIA-PaCa-2 pancreatic cancer cell growth. Values are the mean ( $\pm$ SEM) of quadruplicate. D in the figure legend denotes days of treatment. \*\*P  $\leq$  0.01.
